# Supplementary material for: Complete chloroplast genomes of Achnatherum inebrians and comparative analyses with related species from Poaceae
Source: PubMed Central journal article supplement (PMC8167873; doi:10.1002/2211-5463.13170), 2021-05-10
Supplement: FEB4-11-1704-s001.pdf [file FEB4-11-1704-s001.pdf]

Tree scale: 0.01

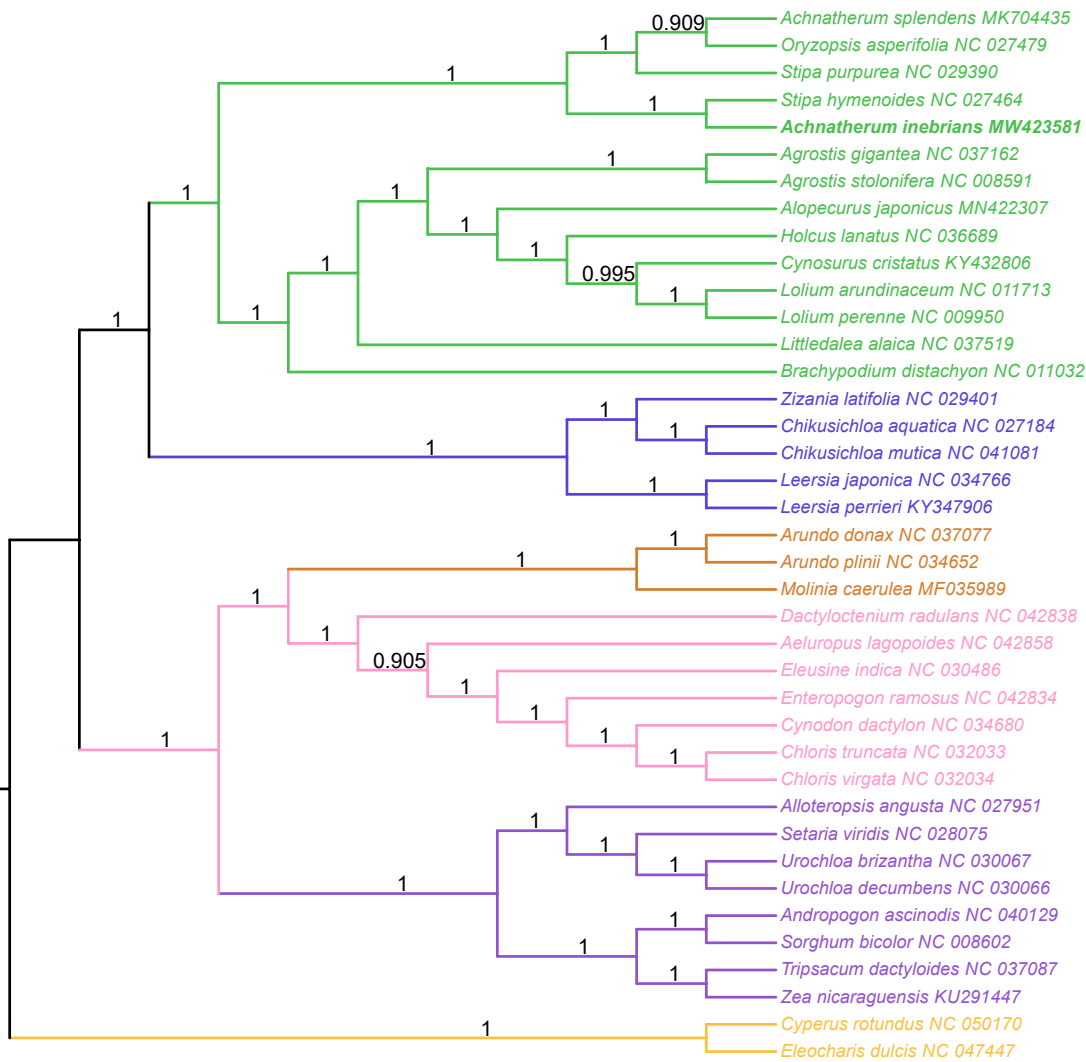

Pooideae

Oryzoideae

Arundinoideae

Chloridoideae

Panicoideae

Cyperoideae
